# Supplementary material for: A yeast–malic acid crosslinker/polyacrylic acid hydrogel containing doxycycline for the treatment of periodontitis
Source: Royal Society of Chemistry journal article supplement (doi:10.1039/d4ra02638a), 2024-01-01
Supplement: d4ra02638a1.pdf [file d4ra02638a1.pdf]

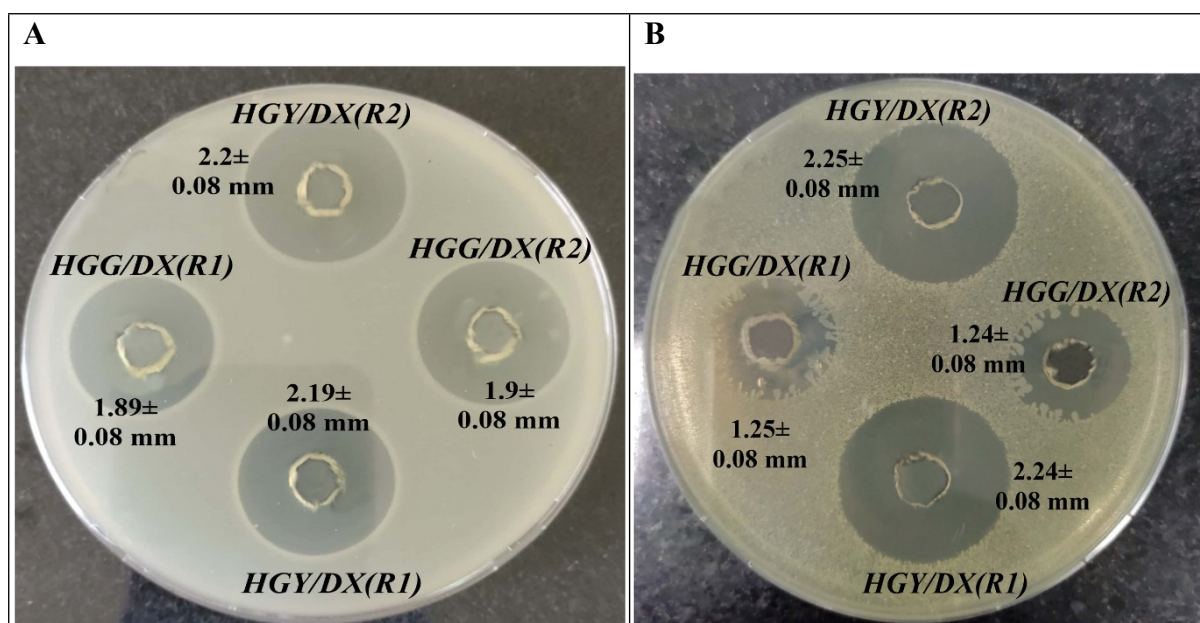

**Supplementary figure:** A part showed zone of inhibition of HGG/DX and HGY/DX in the case of *P. gingivalis*, while part B showed zoned of inhibition in the case of *A. viscosus*
